# Supplementary material for: First-Trimester Crown-Rump Length and Embryonic Volume of Fetuses with Structural Congenital Abnormalities Measured in Virtual Reality: An Observational Study
Source: Hindawi journal article supplement (doi:10.1155/2017/1953076), 2017-01-01
Supplement: f1 [file 1953076.f1.pdf]

**Supplemental figure 1**

The different groups of structural congenital abnormalities are plotted separately on the references curves for CRL and EV; craniofacial abnormalities (A), cardiac abnormalities (B), skeletal and/or muscle abnormalities (C), gastro-intestinal abnormalities (D), urogenital abnormalities (E), neurological abnormalities (F) and hydropic abnormalities (G).

A

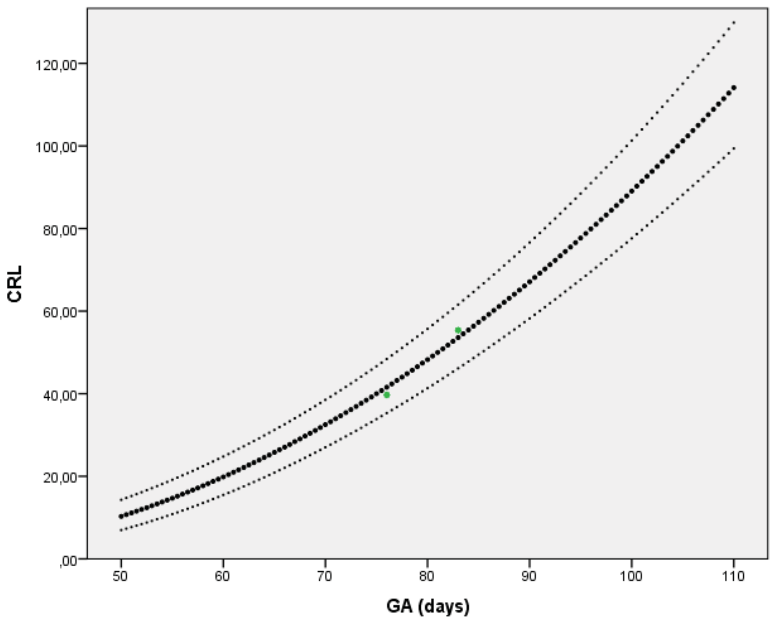

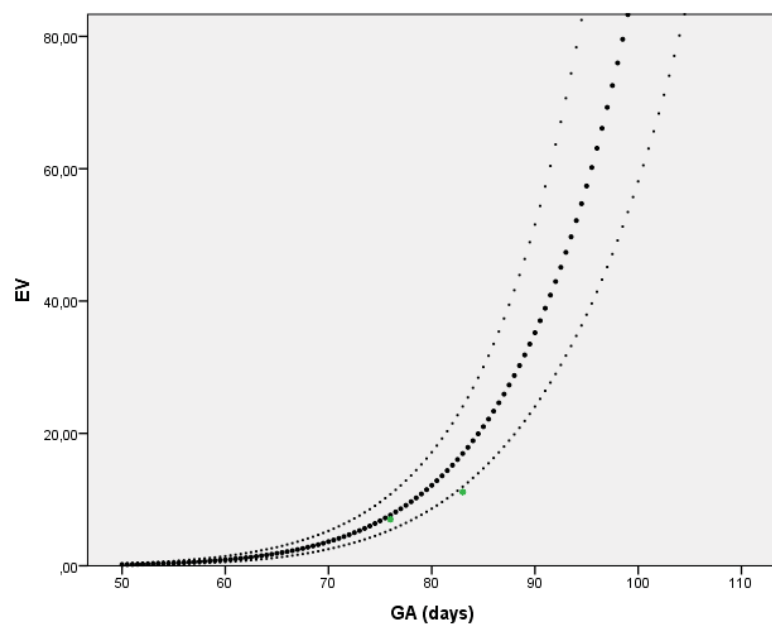

367  
368

369 B

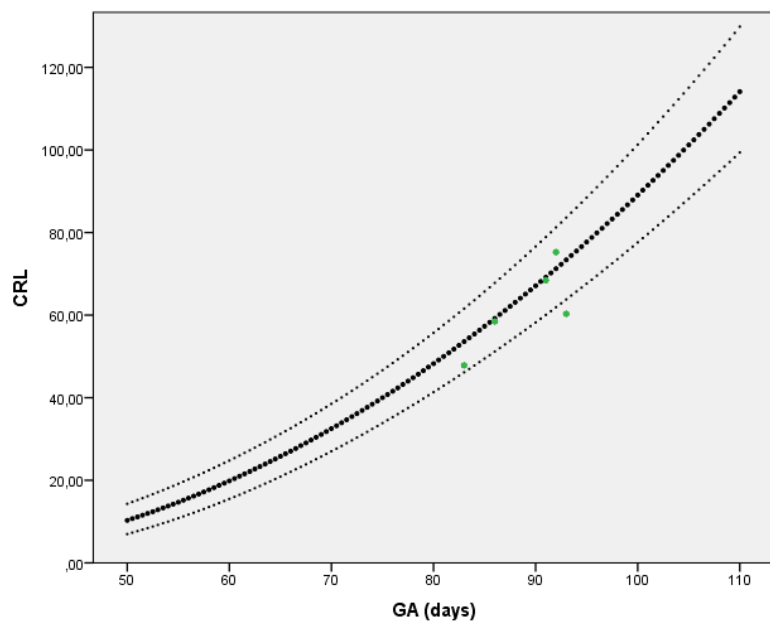

370  
371  
372

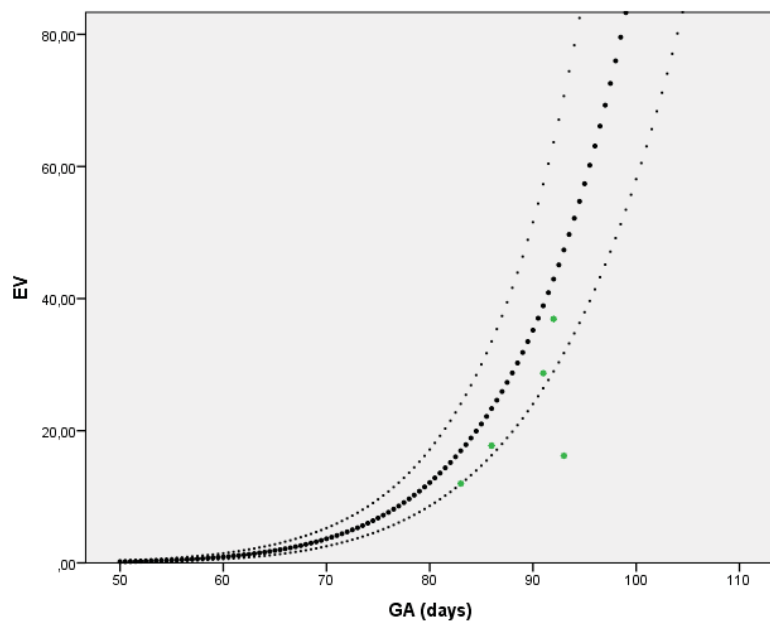

373  
374  
375  
376 C

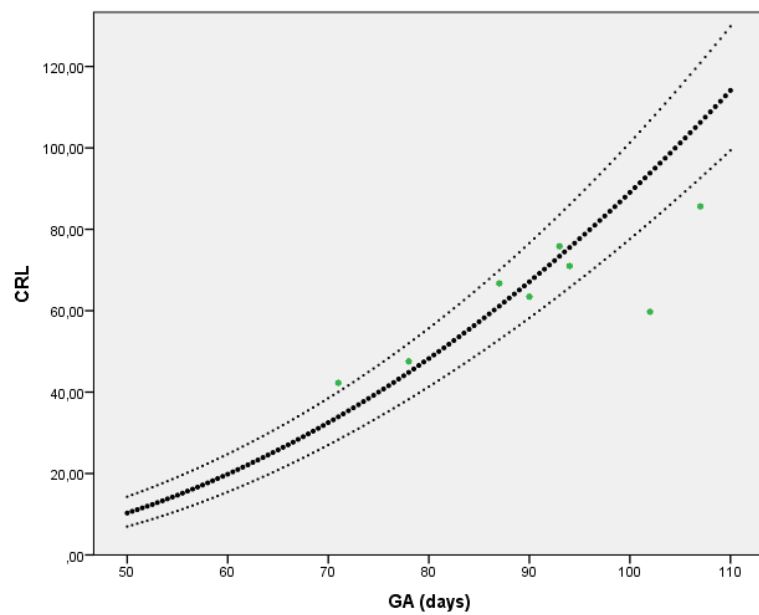

377  
378

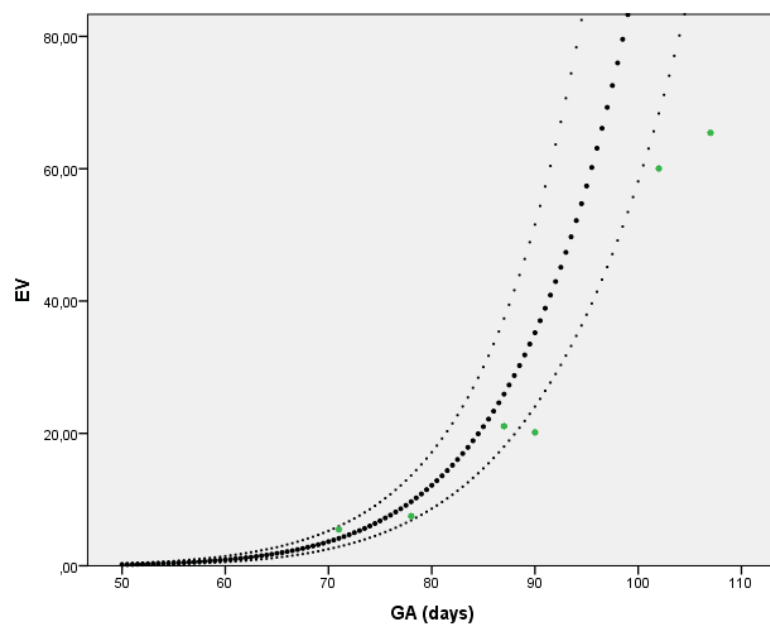

379  
380  
381  
382

383 D

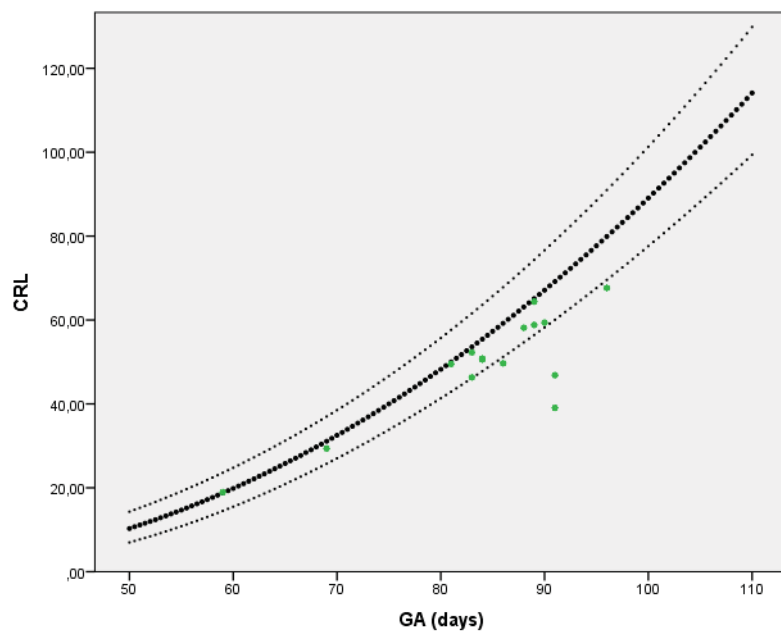

384

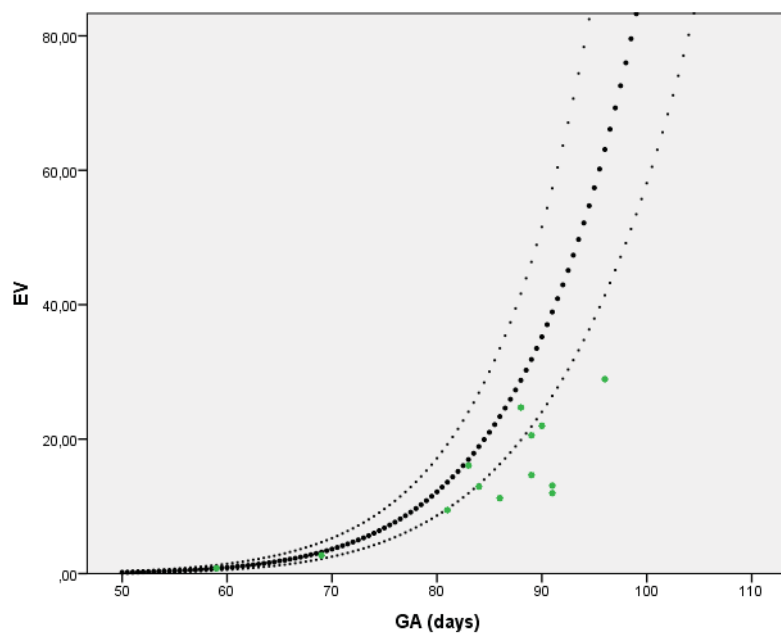

385

386

387

388

389 E

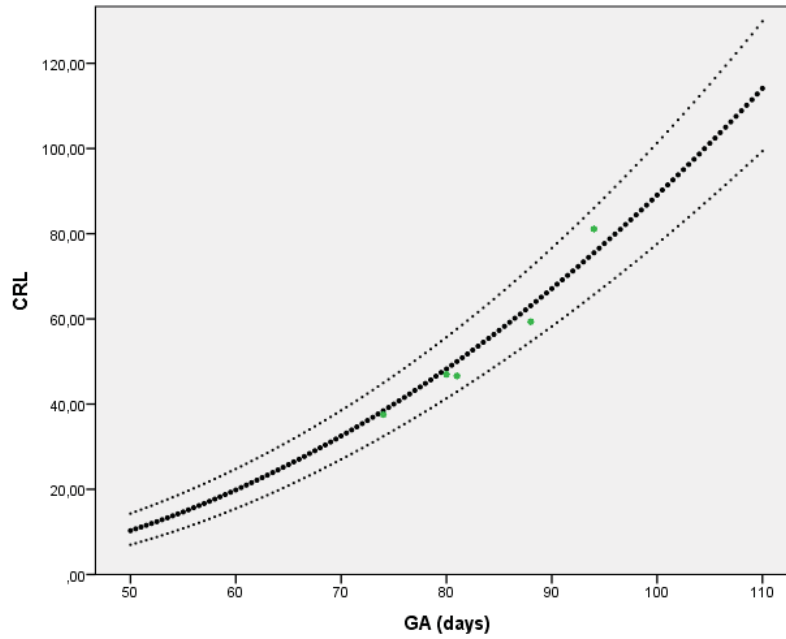

390  
391

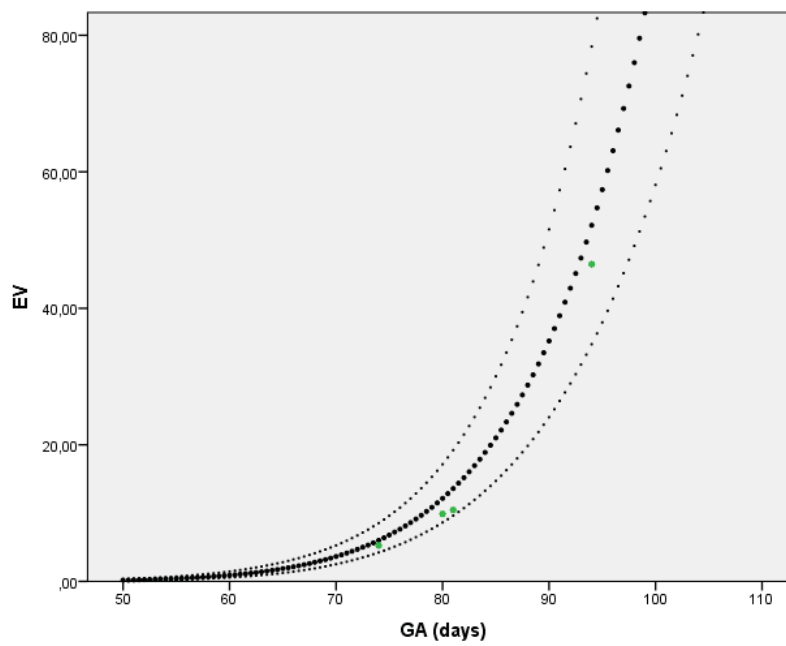

392  
393  
394

395 F

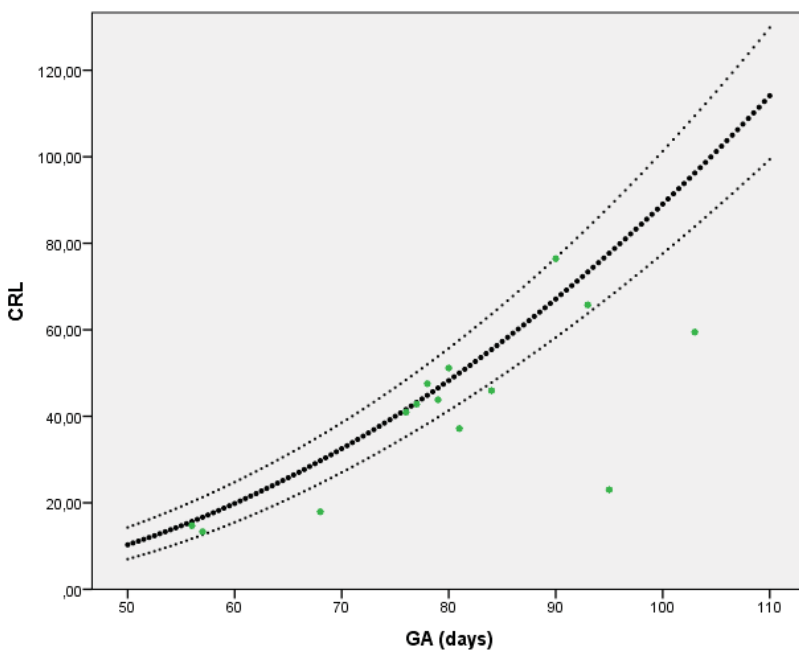

396  
397

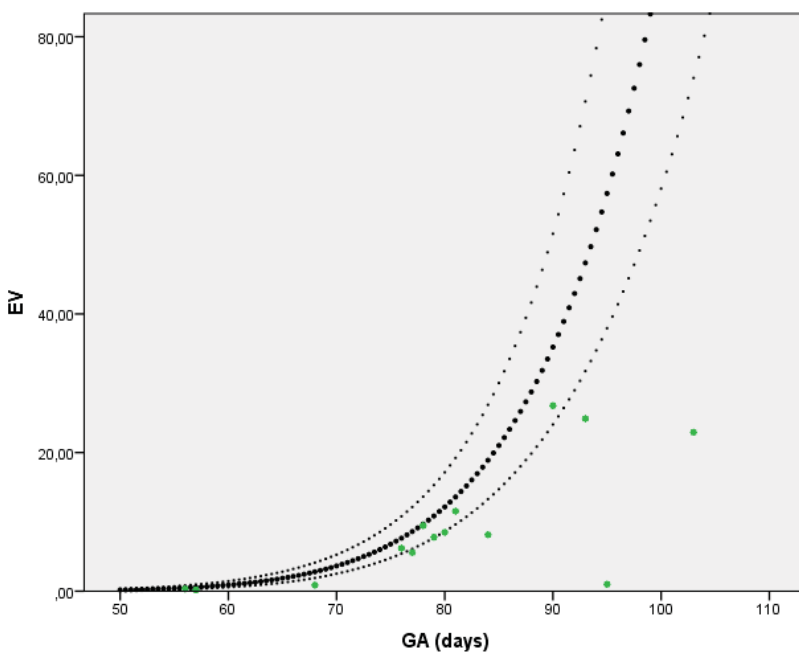

398  
399  
400

401 G

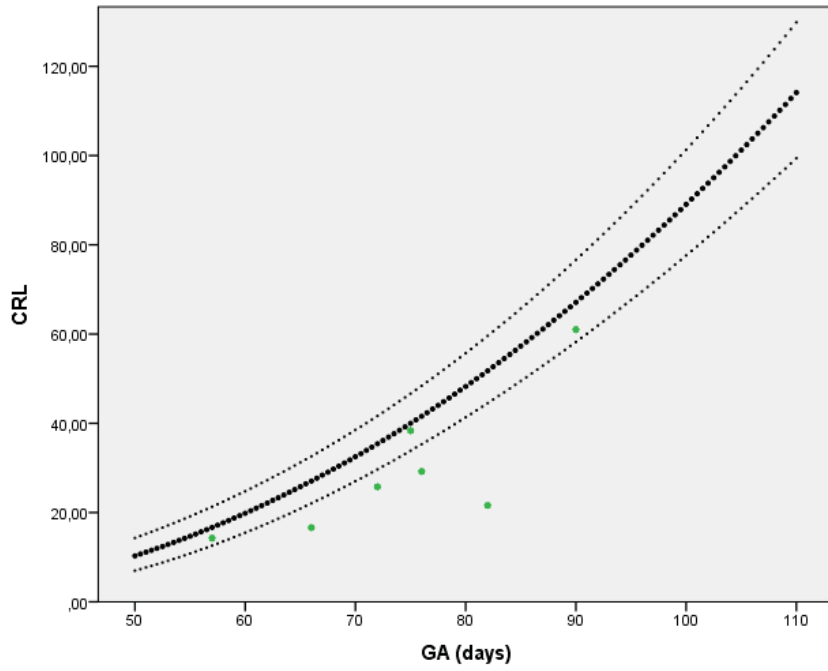

402  
403

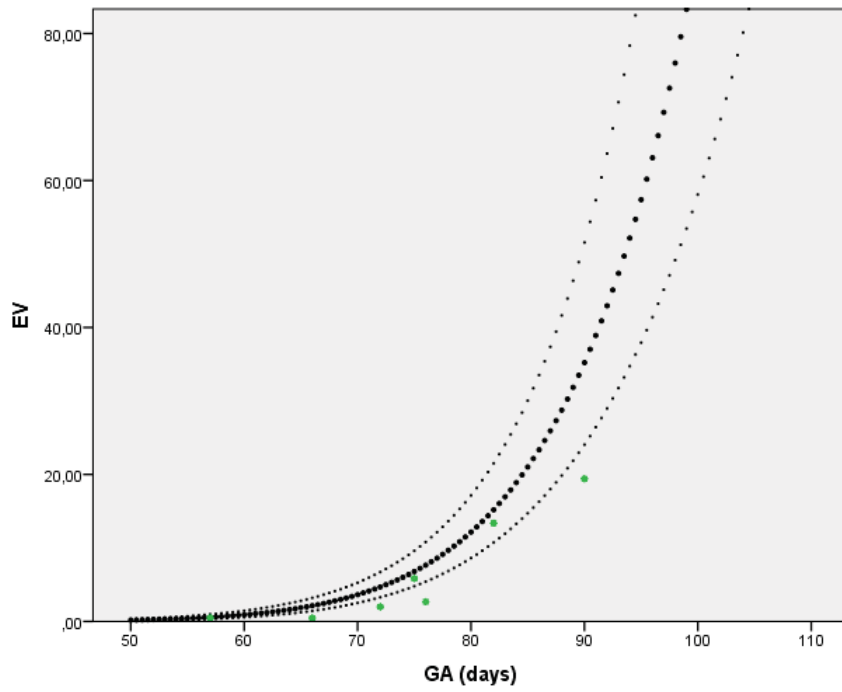

404  
405
